# Supplementary material for: 2015 versus 2021: Self-Reported Preparedness to Prescribe Antibiotics Prudently among Final Year Medical Students in Sweden
Source: MDPI journal article supplement (doi:10.3390/antibiotics13040303), 2024-03-27
Supplement: s1 [file s1]

1. In which age category are you?

☐ 20-25

☐ 26-30

☐ 31-35

☐  $\geq 36$

2. What is your sex?

☐ Female

☐ Male

☐ Do not want to answer

3. Which medical school are you studying at?

☐ Karolinska Institutet

☐ Uppsala University

☐ Umeå University

☐ Lund University

☐ Gothenburg University

☐ Örebro University

☐ Linköping University

4. Which semester are you currently studying in medical school?

☐ 10

☐ 11

☐ Other (please specify)

5. During which semester do you have your infectious diseases course and clinical rotation?

☐ 5

☐ 6

☐ 7

☐ 8

☐ 9

☐ 10

☐ 11

☐ Other (please specify)

\* 6. Diagnosis of infection

I feel...

|                                                                                                              | No<br>teaching<br>was<br>provided | 1 (Not at<br>all<br>prepared) | 2                     | 3                     | 4<br>(Sufficiently<br>prepared) | 5                     | 6                     | 7 (Very<br>well<br>prepared) | I am<br>unsure<br>how I feel | I do not<br>understand<br>the<br>question |
|--------------------------------------------------------------------------------------------------------------|-----------------------------------|-------------------------------|-----------------------|-----------------------|---------------------------------|-----------------------|-----------------------|------------------------------|------------------------------|-------------------------------------------|
| To recognise the clinical signs of infection                                                                 | <input type="radio"/>             | <input type="radio"/>         | <input type="radio"/> | <input type="radio"/> | <input type="radio"/>           | <input type="radio"/> | <input type="radio"/> | <input type="radio"/>        | <input type="radio"/>        | <input type="radio"/>                     |
| To assess the clinical severity of infection (e.g using criteria, such as the septic shock criteria)         | <input type="radio"/>             | <input type="radio"/>         | <input type="radio"/> | <input type="radio"/> | <input type="radio"/>           | <input type="radio"/> | <input type="radio"/> | <input type="radio"/>        | <input type="radio"/>        | <input type="radio"/>                     |
| To use point- of-care tests (e.g. urine dipstick, rapid diagnostic tests for streptococcal pharyngitis)      | <input type="radio"/>             | <input type="radio"/>         | <input type="radio"/> | <input type="radio"/> | <input type="radio"/>           | <input type="radio"/> | <input type="radio"/> | <input type="radio"/>        | <input type="radio"/>        | <input type="radio"/>                     |
| To interpret biochemical markers of inflammation (e.g. CRP)                                                  | <input type="radio"/>             | <input type="radio"/>         | <input type="radio"/> | <input type="radio"/> | <input type="radio"/>           | <input type="radio"/> | <input type="radio"/> | <input type="radio"/>        | <input type="radio"/>        | <input type="radio"/>                     |
| To decide when it is important to take microbiological samples before starting antibiotic therapy            | <input type="radio"/>             | <input type="radio"/>         | <input type="radio"/> | <input type="radio"/> | <input type="radio"/>           | <input type="radio"/> | <input type="radio"/> | <input type="radio"/>        | <input type="radio"/>        | <input type="radio"/>                     |
| To interpret basic microbiological investigations (e.g. blood cultures, antibiotic susceptibility reporting) | <input type="radio"/>             | <input type="radio"/>         | <input type="radio"/> | <input type="radio"/> | <input type="radio"/>           | <input type="radio"/> | <input type="radio"/> | <input type="radio"/>        | <input type="radio"/>        | <input type="radio"/>                     |

\* 7. Indications for no antibiotic treatment

I feel...

|                                                                                                              | No<br>teaching<br>was<br>provided | 1 (Not at<br>all<br>prepared) | 2                     | 3                     | 4<br>(Sufficiently<br>prepared) | 5                     | 6                     | 7 (Very<br>well<br>prepared) | I am<br>unsure<br>how I feel | I do not<br>understand<br>the<br>question |
|--------------------------------------------------------------------------------------------------------------|-----------------------------------|-------------------------------|-----------------------|-----------------------|---------------------------------|-----------------------|-----------------------|------------------------------|------------------------------|-------------------------------------------|
| To identify clinical<br>situations when not<br>to prescribe an<br>antibiotic                                 | <input type="radio"/>             | <input type="radio"/>         | <input type="radio"/> | <input type="radio"/> | <input type="radio"/>           | <input type="radio"/> | <input type="radio"/> | <input type="radio"/>        | <input type="radio"/>        | <input type="radio"/>                     |
| To differentiate<br>between bacterial<br>colonisation and<br>infection (e.g.<br>asymptomatic<br>bacteriuria) | <input type="radio"/>             | <input type="radio"/>         | <input type="radio"/> | <input type="radio"/> | <input type="radio"/>           | <input type="radio"/> | <input type="radio"/> | <input type="radio"/>        | <input type="radio"/>        | <input type="radio"/>                     |
| To differentiate<br>between bacterial<br>and viral upper<br>respiratory tract<br>infections                  | <input type="radio"/>             | <input type="radio"/>         | <input type="radio"/> | <input type="radio"/> | <input type="radio"/>           | <input type="radio"/> | <input type="radio"/> | <input type="radio"/>        | <input type="radio"/>        | <input type="radio"/>                     |

\* 8. Initial antibiotic therapy

I feel...

|                                                                                                                                                   | No<br>teaching<br>was<br>provided | 1 (Not at<br>all<br>prepared) | 2                     | 3                     | 4<br>(Sufficiently<br>prepared) | 5                     | 6                     | 7 (Very<br>well<br>prepared) | I am<br>unsure<br>how I feel | I do not<br>understand<br>the<br>question |
|---------------------------------------------------------------------------------------------------------------------------------------------------|-----------------------------------|-------------------------------|-----------------------|-----------------------|---------------------------------|-----------------------|-----------------------|------------------------------|------------------------------|-------------------------------------------|
| To select initial empirical therapy based on the most likely pathogen(s) and antibiotic resistance patterns, without using guidelines             | <input type="radio"/>             | <input type="radio"/>         | <input type="radio"/> | <input type="radio"/> | <input type="radio"/>           | <input type="radio"/> | <input type="radio"/> | <input type="radio"/>        | <input type="radio"/>        | <input type="radio"/>                     |
| To decide the urgency of antibiotic administration in different situations (e.g. <1 hr for severe sepsis, non-urgent for chronic bone infections) | <input type="radio"/>             | <input type="radio"/>         | <input type="radio"/> | <input type="radio"/> | <input type="radio"/>           | <input type="radio"/> | <input type="radio"/> | <input type="radio"/>        | <input type="radio"/>        | <input type="radio"/>                     |
| To prescribe antibiotic therapy according to national/local guidelines                                                                            | <input type="radio"/>             | <input type="radio"/>         | <input type="radio"/> | <input type="radio"/> | <input type="radio"/>           | <input type="radio"/> | <input type="radio"/> | <input type="radio"/>        | <input type="radio"/>        | <input type="radio"/>                     |
| To assess antibiotic allergies (e.g. differentiating between anaphylaxis and hypersensitivity)                                                    | <input type="radio"/>             | <input type="radio"/>         | <input type="radio"/> | <input type="radio"/> | <input type="radio"/>           | <input type="radio"/> | <input type="radio"/> | <input type="radio"/>        | <input type="radio"/>        | <input type="radio"/>                     |
| To identify indications for combination antibiotic therapy                                                                                        | <input type="radio"/>             | <input type="radio"/>         | <input type="radio"/> | <input type="radio"/> | <input type="radio"/>           | <input type="radio"/> | <input type="radio"/> | <input type="radio"/>        | <input type="radio"/>        | <input type="radio"/>                     |
| To decide the shortest possible adequate duration of antibiotic therapy for a specific infection                                                  | <input type="radio"/>             | <input type="radio"/>         | <input type="radio"/> | <input type="radio"/> | <input type="radio"/>           | <input type="radio"/> | <input type="radio"/> | <input type="radio"/>        | <input type="radio"/>        | <input type="radio"/>                     |
| To prescribe using principles of surgical antibiotic prophylaxis                                                                                  | <input type="radio"/>             | <input type="radio"/>         | <input type="radio"/> | <input type="radio"/> | <input type="radio"/>           | <input type="radio"/> | <input type="radio"/> | <input type="radio"/>        | <input type="radio"/>        | <input type="radio"/>                     |

\* 9. Reassessment of antibiotic therapy

I feel...

|                                                                                                                                   | No<br>teaching<br>was<br>provided | 1 ( Not at<br>all<br>prepared) | 2                     | 3                     | 4<br>(Sufficiently<br>prepared) | 5                     | 6                     | 7 (Very<br>well<br>prepared) | I am<br>unsure<br>how I feel | I do not<br>understand<br>the<br>question |
|-----------------------------------------------------------------------------------------------------------------------------------|-----------------------------------|--------------------------------|-----------------------|-----------------------|---------------------------------|-----------------------|-----------------------|------------------------------|------------------------------|-------------------------------------------|
| To review the need to continue or change antibiotic therapy after 48-72 hours, based on clinical evolution and laboratory results | <input type="radio"/>             | <input type="radio"/>          | <input type="radio"/> | <input type="radio"/> | <input type="radio"/>           | <input type="radio"/> | <input type="radio"/> | <input type="radio"/>        | <input type="radio"/>        | <input type="radio"/>                     |
| To assess clinical outcomes and possible reasons for failure of antibiotic treatment                                              | <input type="radio"/>             | <input type="radio"/>          | <input type="radio"/> | <input type="radio"/> | <input type="radio"/>           | <input type="radio"/> | <input type="radio"/> | <input type="radio"/>        | <input type="radio"/>        | <input type="radio"/>                     |
| To decide when to switch from intravenous (IV) to oral antibiotic therapy                                                         | <input type="radio"/>             | <input type="radio"/>          | <input type="radio"/> | <input type="radio"/> | <input type="radio"/>           | <input type="radio"/> | <input type="radio"/> | <input type="radio"/>        | <input type="radio"/>        | <input type="radio"/>                     |

\* 10. Quality of care

I feel...

|                                                                                                     | No<br>teaching<br>was<br>provided | 1 ( Not at<br>all<br>prepared) | 2                     | 3                     | 4<br>(Sufficiently<br>prepared) | 5                     | 6                     | 7 (Very<br>well<br>prepared) | I am<br>unsure<br>how I feel | I do not<br>understand<br>the<br>question |
|-----------------------------------------------------------------------------------------------------|-----------------------------------|--------------------------------|-----------------------|-----------------------|---------------------------------|-----------------------|-----------------------|------------------------------|------------------------------|-------------------------------------------|
| To measure/audit antibiotic use in a clinical setting, and to interpret the results of such studies | <input type="radio"/>             | <input type="radio"/>          | <input type="radio"/> | <input type="radio"/> | <input type="radio"/>           | <input type="radio"/> | <input type="radio"/> | <input type="radio"/>        | <input type="radio"/>        | <input type="radio"/>                     |
| To work within the multi- disciplinary team in managing antibiotic use in hospitals                 | <input type="radio"/>             | <input type="radio"/>          | <input type="radio"/> | <input type="radio"/> | <input type="radio"/>           | <input type="radio"/> | <input type="radio"/> | <input type="radio"/>        | <input type="radio"/>        | <input type="radio"/>                     |

\* 11. Communication skills

I feel...

|                                                                                                                                                                                                                           | No<br>teaching<br>was<br>provided | 1 ( Not at<br>all<br>prepared) | 2                     | 3                     | 4<br>(Sufficiently<br>prepared) | 5                     | 6                     | 7 (Very<br>well<br>prepared) | I am<br>unsure<br>how I feel | I do not<br>understand<br>the<br>question |
|---------------------------------------------------------------------------------------------------------------------------------------------------------------------------------------------------------------------------|-----------------------------------|--------------------------------|-----------------------|-----------------------|---------------------------------|-----------------------|-----------------------|------------------------------|------------------------------|-------------------------------------------|
| To discuss antibiotic<br>use with patients<br>who are asking<br>for antibiotics,<br>when I feel they are<br>not necessary                                                                                                 | <input type="radio"/>             | <input type="radio"/>          | <input type="radio"/> | <input type="radio"/> | <input type="radio"/>           | <input type="radio"/> | <input type="radio"/> | <input type="radio"/>        | <input type="radio"/>        | <input type="radio"/>                     |
| To communicate<br>with senior doctors<br>in situations where I<br>feel antibiotics are<br>not necessary, but I<br>feel I am being<br>inappropriately<br>pressured into<br>prescribing<br>antibiotics by senior<br>doctors | <input type="radio"/>             | <input type="radio"/>          | <input type="radio"/> | <input type="radio"/> | <input type="radio"/>           | <input type="radio"/> | <input type="radio"/> | <input type="radio"/>        | <input type="radio"/>        | <input type="radio"/>                     |

\* 12. Antibiotic resistance

I feel...

|                                                                                                                                                       | No<br>teaching<br>was<br>provided | 1 (Not at<br>all<br>prepared) | 2                     | 3                     | 4<br>(Sufficiently<br>prepared) | 5                     | 6                     | 7 (Very<br>well<br>prepared) | I am<br>unsure<br>how I feel | I do not<br>understand<br>the<br>question |
|-------------------------------------------------------------------------------------------------------------------------------------------------------|-----------------------------------|-------------------------------|-----------------------|-----------------------|---------------------------------|-----------------------|-----------------------|------------------------------|------------------------------|-------------------------------------------|
| To use knowledge of the common mechanisms of antibiotic resistance in pathogens                                                                       | <input type="radio"/>             | <input type="radio"/>         | <input type="radio"/> | <input type="radio"/> | <input type="radio"/>           | <input type="radio"/> | <input type="radio"/> | <input type="radio"/>        | <input type="radio"/>        | <input type="radio"/>                     |
| To use knowledge of the epidemiology of bacterial resistance, including local/regional variations                                                     | <input type="radio"/>             | <input type="radio"/>         | <input type="radio"/> | <input type="radio"/> | <input type="radio"/>           | <input type="radio"/> | <input type="radio"/> | <input type="radio"/>        | <input type="radio"/>        | <input type="radio"/>                     |
| To practise effective Infection control and hygiene (to prevent spread of bacteria)                                                                   | <input type="radio"/>             | <input type="radio"/>         | <input type="radio"/> | <input type="radio"/> | <input type="radio"/>           | <input type="radio"/> | <input type="radio"/> | <input type="radio"/>        | <input type="radio"/>        | <input type="radio"/>                     |
| To use knowledge of the negative consequences of antibiotic use (bacterial resistance, toxic/adverse effects, cost, Clostridium difficile infections) | <input type="radio"/>             | <input type="radio"/>         | <input type="radio"/> | <input type="radio"/> | <input type="radio"/>           | <input type="radio"/> | <input type="radio"/> | <input type="radio"/>        | <input type="radio"/>        | <input type="radio"/>                     |

\* 13. COVID 19

I feel...

|                                                            | No<br>teaching<br>was<br>provided | 1 (Not at<br>all<br>prepared) | 2                     | 3                     | 4<br>(Sufficiently<br>prepared) | 5                     | 6                     | 7 (Very<br>well<br>prepared) | I am<br>unsure<br>how I feel | I do not<br>understand<br>the<br>question |
|------------------------------------------------------------|-----------------------------------|-------------------------------|-----------------------|-----------------------|---------------------------------|-----------------------|-----------------------|------------------------------|------------------------------|-------------------------------------------|
| To prescribe antibiotics for patients with severe covid-19 | <input type="radio"/>             | <input type="radio"/>         | <input type="radio"/> | <input type="radio"/> | <input type="radio"/>           | <input type="radio"/> | <input type="radio"/> | <input type="radio"/>        | <input type="radio"/>        | <input type="radio"/>                     |



### 3. Teaching methods used for antibiotic education

14. Which of the following methods have been used at your medical school for teaching about prudent antibiotic use (the topics from the previous set of questions), and how useful were they?

|                                                                                                                        | Teaching method was not used | Not at all useful     | Neutral               | Useful                | Very useful           | I am unsure           | I do not understand the question |
|------------------------------------------------------------------------------------------------------------------------|------------------------------|-----------------------|-----------------------|-----------------------|-----------------------|-----------------------|----------------------------------|
| Lectures (with > 15 people)                                                                                            | <input type="radio"/>        | <input type="radio"/> | <input type="radio"/> | <input type="radio"/> | <input type="radio"/> | <input type="radio"/> | <input type="radio"/>            |
| Small group teaching (with <15 people)                                                                                 | <input type="radio"/>        | <input type="radio"/> | <input type="radio"/> | <input type="radio"/> | <input type="radio"/> | <input type="radio"/> | <input type="radio"/>            |
| Discussions of clinical cases and vignettes                                                                            | <input type="radio"/>        | <input type="radio"/> | <input type="radio"/> | <input type="radio"/> | <input type="radio"/> | <input type="radio"/> | <input type="radio"/>            |
| Active learning assignments (e.g. article reading, group work, preparing an oral presentation)                         | <input type="radio"/>        | <input type="radio"/> | <input type="radio"/> | <input type="radio"/> | <input type="radio"/> | <input type="radio"/> | <input type="radio"/>            |
| E-learning Role play or communication skills sessions dealing with patients demanding antibiotic therapy               | <input type="radio"/>        | <input type="radio"/> | <input type="radio"/> | <input type="radio"/> | <input type="radio"/> | <input type="radio"/> | <input type="radio"/>            |
| Infectious diseases clinical placement (i.e. clinical rotation or training in infectious diseases, involving patients) | <input type="radio"/>        | <input type="radio"/> | <input type="radio"/> | <input type="radio"/> | <input type="radio"/> | <input type="radio"/> | <input type="radio"/>            |
| Microbiology clinical placement                                                                                        | <input type="radio"/>        | <input type="radio"/> | <input type="radio"/> | <input type="radio"/> | <input type="radio"/> | <input type="radio"/> | <input type="radio"/>            |
| Peer or near-peer teaching (i.e. teaching led by other students, or recently qualified doctors)                        | <input type="radio"/>        | <input type="radio"/> | <input type="radio"/> | <input type="radio"/> | <input type="radio"/> | <input type="radio"/> | <input type="radio"/>            |

Other used often (please specify)

15. Overall, do you feel you have received sufficient teaching at medical school in antibiotic use for your future practice as a junior doctor?

- ☐ Yes
- ☐ No, I feel I had enough teaching on general antibiotic treatment, but I need more on prudent antibiotic use
- ☐ No, I feel I need more education on both general antibiotic treatment and prudent antibiotic use
- ☐ I am unsure
- ☐ Other (please specify)

16. Has any of your teaching on antibiotic prescribing **changed format** due to the covid-19 pandemic e.g. from in-person to digital

- ☐ Yes
- ☐ No
- ☐ Unsure

17. Has any of your teaching on antibiotic prescribing **changed duration** due to the covid-19 pandemic?

- ☐ Yes, we have had more teaching
- ☐ Yes, we have had less teaching
- ☐ No
- ☐ Unsure

18. Do you believe that the **quality** of your teaching on antibiotic prescribing has been affected by the covid-19 pandemic?

- |                                     |                                     |
|-------------------------------------|-------------------------------------|
| <input type="radio"/> Much improved | <input type="radio"/> Worsened      |
| <input type="radio"/> Improved      | <input type="radio"/> Much worsened |
| <input type="radio"/> No effect     | <input type="radio"/> Unsure        |

19. Do you feel overall that the covid-19 pandemic and its effects on your teaching has affected how prepared you feel to prescribe antibiotics prudently?

- ☐ Much improved
- ☐ Improved
- ☐ No effect
- ☐ Worsened
- ☐ Much worsened
- ☐ Unsure

20. Have you had teaching on prescribing antibiotics for patients with covid-19?

- ☐ Yes, by clinical supervisors
- ☐ Yes, at lectures, seminars or case-based discussions
- ☐ No
- ☐ Unsure
- ☐ Other (please specify)

21. Have any of your medical school examinations included questions on antibiotic treatment?

- ☐ Yes
- ☐ No
- ☐ Unsure
- ☐ Other (please specify)

22. How do you think teaching on antibiotic treatment and prudent antibiotic use can be improved?

#### 4. Survey language and follow-up

23. How did you find the language used in this study?

- ☐ I could understand everything or almost everything
- ☐ I could understand most questions, it was alright for the survey to be in English
- ☐ Many questions were difficult to understand, I would have preferred the survey in my native language
- ☐ Most of the survey was difficult to understand, I would have preferred the survey in my native language
- ☐ Other (please specify)

#### Student-PREPARE 2021

Thank you for participating in Student-PREPARE 2021, we really appreciate the time you have taken to answer these questions, and we are very hopeful that this will help improve education on antibiotic use at medical schools in Sweden.
