# Supplementary material for: 2015 versus 2021: Self-Reported Preparedness to Prescribe Antibiotics Prudently among Final Year Medical Students in Sweden
Source: MDPI journal article supplement (doi:10.3390/antibiotics13040303), 2024-03-27
Supplement: s1 [file s1]

**2015 versus 2021: self-reported preparedness to prescribe antibiotics prudently among final year medical students in Sweden**

**Supplementary materials**

Figure S1: Response rate at each medical school, 2015 and 2021

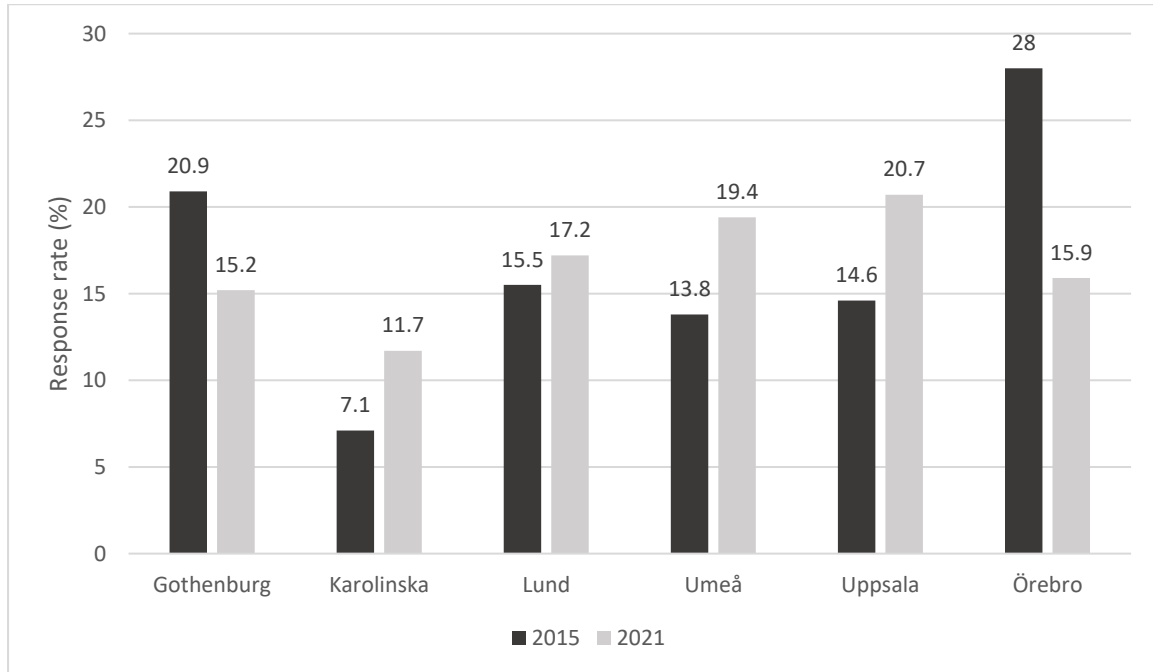

Table S1: Differences in global preparedness scores between medical schools, 2015 and 2021.

| <i>Medical school</i> | <i>Global preparedness score 2015 (%)</i> | <i>Global preparedness score 2021 (%)</i> | <i>P-value</i>   |
|-----------------------|-------------------------------------------|-------------------------------------------|------------------|
| Gothenburg University | 80.5                                      | 78                                        | 0.0616           |
| Karolinska Institutet | 83.3                                      | 79.8                                      | <b>0.0042</b>    |
| Lund University       | 82.2                                      | 79.1                                      | 0.0666           |
| Umeå University       | 82.3                                      | 69.3                                      | <b>&lt;0.001</b> |
| Uppsala University    | 85.9                                      | 82.5                                      | 0.0526           |
| Örebro University     | 84.9                                      | 73.4                                      | <b>&lt;0.001</b> |
| Average               | 83.2                                      | 77                                        | <b>&lt;0.001</b> |

Table S2. Absolute percentage change in curriculum preparedness score in 2021 versus 2015 per medical school.

| Topic                                                                                                                                         | Absolute change <sup>1</sup> in preparedness score per topic (%) |            |       |       |         |        |
|-----------------------------------------------------------------------------------------------------------------------------------------------|------------------------------------------------------------------|------------|-------|-------|---------|--------|
|                                                                                                                                               | Gothenburg                                                       | Karolinska | Lund  | Umeå  | Uppsala | Örebro |
| To recognize the clinical signs of infection                                                                                                  | 0.0                                                              | 0.0        | -0.3  | 0.8   | 0.0     | 0.0    |
| To assess the clinical severity of infection (e.g. using criteria, such as septic shock criteria)                                             | 5.9                                                              | -0.7       | -6.5  | -7.5  | -3.9    | -11.1  |
| To use point-of-care tests (e.g. urine dipstick, rapid diagnostic tests for streptococcal pharyngitis)                                        | -0.9                                                             | 3.9        | 4.4   | -14.8 | -10.3   | -7.7   |
| To interpret biochemical markers of inflammation (e.g. CRP)                                                                                   | -0.3                                                             | -0.5       | 2.9   | 4.3   | -1.7    | 0.3    |
| To decide when it is important to take microbiological samples before starting antibiotic therapy                                             | -6.9                                                             | 0.9        | 1.0   | -5.9  | -0.3    | 0.3    |
| To interpret basic microbiological investigations (e.g. blood cultures, antibiotic susceptibility reporting)                                  | -6.8                                                             | 6.0        | 1.0   | -1.6  | -5.3    | -2.1   |
| To identify clinical situations when not to prescribe an antibiotic                                                                           | -2.6                                                             | -2.7       | -14.3 | -8.9  | -7.0    | -30.2  |
| To differentiate between bacterial colonization and infection (e.g. asymptomatic bacteriuria)                                                 | -4.9                                                             | -3.3       | 2.1   | -6.2  | -2.0    | -19.1  |
| To differentiate between bacterial and viral upper respiratory tract infections                                                               | -8.9                                                             | -9.8       | -6.0  | -19.1 | -2.6    | -25.0  |
| To select initial empirical therapy based on the most likely pathogen(s) and antibiotic resistance patterns, without using guidelines         | -12.9                                                            | -10.0      | -8.7  | -26.6 | 2.6     | -15.7  |
| To decide the urgency of antibiotic administration in different situations (e.g. <1 hr for severe sepsis, non-urgent chronic bone infections) | 9.4                                                              | -5.9       | -17.7 | -14.5 | -0.9    | 4.1    |
| To prescribe antibiotic therapy according to national/local guidelines                                                                        | 3.6                                                              | -4.8       | -8.1  | -11.6 | -4.2    | -7.4   |
| To assess antibiotic allergies (e.g. differentiating between anaphylaxis and hypersensitivity)                                                | 25.5                                                             | -3.2       | -7.4  | -15.3 | -13.9   | -18.5  |
| To identify indications for combination antibiotic therapy                                                                                    | -5.4                                                             | -20.2      | -8.2  | -22.0 | -8.0    | -25.8  |
| To decide the shortest possible adequate duration of antibiotic therapy for a specific infection                                              | -24.9                                                            | 0.4        | -0.4  | -31.7 | -5.9    | -31.7  |
| To prescribe using principles of surgical antibiotic prophylaxis                                                                              | -25.8                                                            | 0.3        | -4.6  | -22.0 | -14.5   | 6.4    |
| To review the need to continue or change antibiotic therapy after 48-72 hours, based on clinical evolution and laboratory results             | -3.8                                                             | -0.5       | 11.9  | -13.4 | -25.6   | 1.6    |
| To assess clinical outcomes and possible reasons for failure of antibiotic treatment                                                          | -1.5                                                             | -4.4       | -3.4  | -12.3 | -1.2    | -4.2   |
| To decide when to switch from intravenous (IV) to oral antibiotic therapy                                                                     | -4.2                                                             | -13.4      | -8.4  | -22.0 | -6.8    | -18.1  |

|                                                                                                                                                                                             |       |       |       |       |       |       |
|---------------------------------------------------------------------------------------------------------------------------------------------------------------------------------------------|-------|-------|-------|-------|-------|-------|
| To measure/audit antibiotic use in a clinical setting, and to interpret the results of such studies                                                                                         | -7.8  | -17.9 | -7.9  | -30.6 | -11.2 | -25.2 |
| To work within the multi-disciplinary team in managing antibiotic use in hospitals                                                                                                          | 1.3   | 1.3   | 5.4   | -2.0  | -6.7  | -17.2 |
| To discuss antibiotic use with patients who are asking for antibiotics, when I feel they are not necessary                                                                                  | -4.5  | 3.9   | 2.1   | -6.7  | 1.1   | -7.7  |
| To communicate with senior doctors in situations where I feel antibiotics are not necessary, but I feel I am being inappropriately pressured into prescribing antibiotics by senior doctors | -9.2  | -26.5 | -0.4  | -12.8 | -12.6 | -48.4 |
| To use knowledge of the common mechanisms of antibiotic resistance in pathogens                                                                                                             | -1.4  | -4.5  | 5.9   | -18.8 | -0.9  | -30.6 |
| To use knowledge of the epidemiology of bacterial resistance, including local/regional variations                                                                                           | -10.3 | -9.5  | -13.1 | -40.6 | -3.5  | -24.0 |
| To practice effective infection control and hygiene (to prevent spread of bacteria)                                                                                                         | -6.6  | -2.6  | -3.1  | -0.3  | -1.7  | -5.6  |
| To use knowledge of the negative consequences of antibiotic use (bacterial resistance, toxic/adverse effects, cost, Clostridium difficile infections)                                       | -2.3  | 2.4   | -3.1  | -8.6  | -1.7  | 3.1   |

---

<sup>1</sup> A negative result indicates a lower score in 2021 than in 2015.
